# Supplementary material for: EXO1 is associated with Ku-independent DNA double strand break repair pathway and the inhibition of EXO1 chemosensitizes DDP resistance lung cancer cells
Source: Research Square preprint supplement (doi:10.21203/rs.3.rs-8486386/v1), 2026-01-12
Supplement: Supplementary file 1 [file 15b0fa5b69433eb555940a54.docx]

Primer sequence of 22 genes

| Gene name | Primer sequence |
| --- | --- |
| FEN1-FORWARD | 5＇-TCATCCAGAAGCACAAGAGCATCG-3＇ |
| FEN1-REVERSE | 5＇-CCAGCACCTCAGGTTCCAAGAAG-3＇ |
| EXO1-FORWARD | 5＇-CAAGCACAGCATTGCAGCAGTTC-3＇ |
| EXO1-REVERSE | 5＇-AGACTCATCGTCACTGGACTCCTC-3＇ |
| FUBP1-FORWARD | 5＇-ACAACAGATAGACTATGCTCGG-3＇ |
| FUBP1-REVERSE | 5＇-TATAAGGTGCAGGGTTGTATGG-3＇ |
| HMGB2-FORWARD | 5＇-GAATTCTCCAAGAAGTGTTCGG-3＇ |
| HMGB2-REVERSE | 5＇-CATAGCGAGCTTTGTCACTTTT-3＇ |
| RAD23B-FORWARD | 5＇-AAACTTTGTGGTGGTTATGGTG-3＇ |
| RAD23B-REVERSE | 5＇-GGAGGAAGTAACTGCTGTAGTG-3＇ |
| RPS27-FORWARD | 5＇-GAGGAGAAGAGGAAACACAAGA-3＇ |
| RPS27-REVERSE | 5＇-AGACCGTGGTGATTTTATAGCA-3＇ |
| UBE2N-FORWARD | 5＇-CCTTTGAGGGAGGGACTTTTAA-3＇ |
| UBE2N-REVERSE | 5＇-TTAACAAGGCCTGGATCGATAG-3＇ |
| MDC1-FORWARD | 5＇-CCTCATTGCTCCATTCCACTACGG-3＇ |
| MDC1-REVERSE | 5＇-CTCTGGCTTGGCTTCCTGCTTC-3＇ |
| SSBP1-FORWARD | 5＇-GTGTGCACTTACTTGGGCGA-3＇ |
| SSBP1-REVERSE | 5＇-TCCCCTGATCGCCACATCTC-3＇ |
| POLQ-FORWARD | 5＇-GGTGGTTCAATACTGGCTGCTGAC-3＇ |
| POLQ-REVERSE | 5＇-CCACTCTGCTGCAATGCTCCTG-3＇ |
| TCEA1-FORWARD | 5＇-AATTACATCGCAGAACAGCC-3＇ |
| TCEA1- REVERSE | 5＇-GCATCTCCCTACACTTCAACC-3＇ |
| RBBP4-FORWARD | 5＇-TAGTGCTTCAGATGACCATACC-3＇ |
| RBBP4- REVERSE | 5＇-ATCTTCTACTACTGCCGTATGC-3＇ |
| RUVBL1-FORWARD | 5＇-GAGTGATGATAATCCGGACCAT-3＇ |
| RUVBL1-REVERSE | 5＇-CTCCTCACTGATGTTGATTCCT-3＇ |
| DHX9-FORWARD | 5＇-GCATCAAAAACAAACCTTGAGC-3＇ |
| DHX9-REVERSE | 5＇-CCTAGACGCAGAAGTTTTATGC-3＇ |
| SFPQ-FORWARD | 5＇-GATGATTCGTCAACGTGAGATG-3＇ |
| SFPQ-REVERSE | 5＇-TAGCTTCATAACCTATGCCACC-3＇ |
| NONO-FORWARD | 5＇-ATCCCTTACAGTTCGAAACCTT-3＇ |
| NONO-REVERSE | 5＇-CCTCGATCATCCACAATGACTA-3＇ |
| DEK-FORWARD | 5＇-AAGAATGTGGGTCAGTTCAGTG-3＇ |
| DEK-REVERSE | 5＇-CAGGACATTTGGTTCGCTTA-3＇ |
| TSNAX-FORWARD | 5＇-TTGAAGTGAGCCAGTTTTTACG-3＇ |
| TSNAX-REVERSE | 5＇-GACTTTCAAGGCATAACAAGCA-3＇ |
| PSIP1-FORWARD | 5＇-CAGCATGAGGAAGCGAATAAAA-3＇ |
| PSIP1-REVERSE | 5＇-GAGTCTTTGACCCTGTTTGTTC-3＇ |
| RBMX-FORWARD | 5＇-TCAAGCAGAGATTACCCAAGTT-3＇ |
| RBMX-REVERSE | 5＇-CCACGACCATAATGAGCAAAAT-3＇ |
| STRBP-FORWARD | 5＇-GGCCTTGAGACGAGTAATGGAGTG-3＇ |
| STRBP-REVERSE | 5＇-TCGCTCACAAGGATCATGAAGACC-3＇ |
| ACTIN-F | 5＇-ACC- GAGCGCGGCTACAG-3＇ |
| ACTIN-R | 5＇-CTTAATGTCACGCACGATTTCC-3＇ |
